# Supplementary material
Source: Springer Nature journal article supplement (https://www.springermedizin.de/resource/supplementary/12978_2013_217_MOESM2_ESM.pdf/9602282)

# ARGENTINA

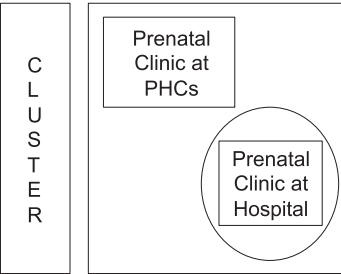

# URUGUAY

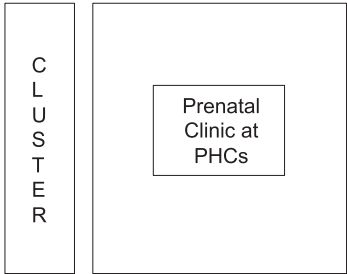

Supplement: MOESM2 [file 9602282]
